# Supplementary material for: Dynamic Evolution and Correlation between Metabolites and Microorganisms during Manufacturing Process and Storage of Fu Brick Tea
Source: MDPI journal article supplement (doi:10.3390/metabo11100703), 2021-10-13
Supplement: s1 [file s1]

Supplementary Table S1. Diversity analysis of fungal communities in FBT samples

| Sample | Community diversity index |             | Community richness index |               | Coverage% |
|--------|---------------------------|-------------|--------------------------|---------------|-----------|
|        | Simpson                   | Shannon     | Ace                      | Chao1         |           |
| S1     | 0.23±0.01c                | 1.85±0.03b  | 126.20±6.03a             | 127.29±10.73a | 99        |
| S2     | 0.19±0d                   | 2.08±0.01a  | 96.00±7.24a              | 89.76±4.19b   | 99        |
| S3     | 0.88±0.02b                | 0.37±0.07c  | 96.20±23.96a             | 79.06±6.85b   | 99        |
| S4     | 0.99±0a                   | 0.03±0.003d | 34.99±20.60bc            | 18.50±7.78cd  | 99        |
| S5     | 1.00±0.001a               | 0.01±0.002d | 7.33±6.66c               | 7.00±1.32d    | 99        |
| S6     | 1.00±0.001a               | 0.02±0.002d | 14.93±9.31bc             | 11.75±6.63d   | 99        |
| S7     | 0.99±0.001a               | 0.03±0.003d | 44.95±22.71b             | 44.17±30.58c  | 99        |

Supplementary Table S2. Diversity analysis of bacterial communities in FBT samples

| Sample | Community diversity index |             | Community richness index |                | Coverage% |
|--------|---------------------------|-------------|--------------------------|----------------|-----------|
|        | Simpson                   | Shannon     | Ace                      | Chao1          |           |
| S1     | 0.22±0.02d                | 1.84±0.07c  | 253.20±15.44b            | 187.52±15.30e  | 99        |
| S2     | 0.24±0.01cd               | 1.82±0.02c  | 255.40±18.03b            | 193.08±26.60d  | 99        |
| S3     | 0.31±0.003c               | 1.70±0.05cd | 258.92±71.43b            | 223.56±55.66cd | 99        |
| S4     | 0.21±0.10d                | 2.58±0.32b  | 295.67±28.12ab           | 294.50±25.85ab | 99        |
| S5     | 0.54±0.04b                | 1.38±0.08d  | 272.07±20.30b            | 272.29±19.95bc | 99        |
| S6     | 0.73±0.01a                | 0.87±0.04e  | 251.65±17.52b            | 250.90±16.54bc | 99        |
| S7     | 0.14±0.07e                | 3.41±0.31a  | 341.65±8.85a             | 342.09±8.57a   | 99        |

Supplementary Table S3. Total of 178 metabolites identified in FBT samples

| no. | RT<br>(min) | m/z      | Formula                                         | Mass error<br>(mDa) | tentative identification   |
|-----|-------------|----------|-------------------------------------------------|---------------------|----------------------------|
| 1   | 5.85        | 441.0825 | C <sub>22</sub> H <sub>18</sub> O <sub>10</sub> | -0.2                | Catechin 3-gallate         |
| 2   | 4.74        | 457.0775 | C <sub>22</sub> H <sub>18</sub> O <sub>11</sub> | -0.2                | Galocatechin 3-gallate     |
| 3   | 5.37        | 273.0762 | C <sub>15</sub> H <sub>14</sub> O <sub>5</sub>  | -0.7                | EA                         |
| 4   | 4.4         | 425.0874 | C <sub>22</sub> H <sub>18</sub> O <sub>9</sub>  | -0.4                | EA 3-gallate               |
| 5   | 4.7         | 289.0712 | C <sub>15</sub> H <sub>14</sub> O <sub>6</sub>  | -0.5                | Epicatechin                |
| 6   | 6.75        | 357.1338 | C <sub>20</sub> H <sub>22</sub> O <sub>6</sub>  | -0.6                | pinorexinol                |
| 7   | 4.07        | 305.0664 | C <sub>15</sub> H <sub>14</sub> O <sub>7</sub>  | -0.3                | Galocatechin               |
| 8   | 4.49        | 349.058  | C <sub>15</sub> H <sub>12</sub> O <sub>7</sub>  | 1.5                 | (2R,3R)-taxifolin distylin |
| 9   | 4.81        | 635.0889 | C <sub>27</sub> H <sub>24</sub> O <sub>18</sub> | -0.1                | 1,2,6-tri-G-glu            |
| 10  | 4.04        | 483.0783 | C <sub>20</sub> H <sub>20</sub> O <sub>14</sub> | 0.3                 | 1,2-di-G-glu               |
| 11  | 4.04        | 483.0783 | C <sub>20</sub> H <sub>20</sub> O <sub>14</sub> | 0.3                 | 1,3-di-G-glu               |
| 12  | 4.81        | 635.0889 | C <sub>27</sub> H <sub>24</sub> O <sub>18</sub> | -0.1                | 1,4,6-tri-G-glu            |

|    |       |          |                                                               |      |                                |
|----|-------|----------|---------------------------------------------------------------|------|--------------------------------|
| 13 | 4.04  | 483.0783 | C <sub>20</sub> H <sub>20</sub> O <sub>14</sub>               | 0.3  | 1,6-di-G-glu                   |
| 14 | 2.49  | 331.0668 | C <sub>13</sub> H <sub>16</sub> O <sub>10</sub>               | -0.3 | 1-G-glu                        |
| 15 | 4.08  | 167.0341 | C <sub>8</sub> H <sub>8</sub> O <sub>4</sub>                  | -0.8 | 2,5-Dihydroxyphenylacetic acid |
| 16 | 4.04  | 483.0783 | C <sub>20</sub> H <sub>20</sub> O <sub>14</sub>               | 0.3  | 2,6-di-G-glu                   |
| 17 | 10.62 | 285.0401 | C <sub>15</sub> H <sub>10</sub> O <sub>6</sub>                | -0.4 | 3',4',5,7-tetraOH-flavone      |
| 18 | 4.93  | 153.019  | C <sub>7</sub> H <sub>6</sub> O <sub>4</sub>                  | -0.4 | 3,5-diOH-benzoic acid          |
| 19 | 4.4   | 183.0293 | C <sub>7</sub> H <sub>6</sub> O <sub>3</sub>                  | -0.6 | 3-Hydroxybenzoic acid          |
| 20 | 4.81  | 337.0925 | C <sub>16</sub> H <sub>18</sub> O <sub>8</sub>                | -0.4 | 3-coumaroyl-quinic acid        |
| 21 | 3.93  | 353.0876 | C <sub>16</sub> H <sub>18</sub> O <sub>9</sub>                | -0.2 | 4-caffeoyl-quinic acid         |
| 22 | 4.81  | 337.0925 | C <sub>16</sub> H <sub>18</sub> O <sub>8</sub>                | -0.4 | 4-coumaroyl-quinic acid        |
| 23 | 4.3   | 353.0874 | C <sub>16</sub> H <sub>18</sub> O <sub>9</sub>                | -0.4 | 5-caffeoyl-quinic acid         |
| 24 | 4.81  | 337.0925 | C <sub>16</sub> H <sub>18</sub> O <sub>8</sub>                | -0.4 | 5-coumaroyl-quinic acid        |
| 25 | 3.63  | 241.0825 | C <sub>10</sub> H <sub>14</sub> N <sub>2</sub> O <sub>5</sub> | -0.5 | 7-Me-xanthine                  |
| 26 | 0.69  | 333.0589 | C <sub>16</sub> H <sub>14</sub> O <sub>8</sub>                | -2.7 | 8-carboxyl-catechin            |
| 27 | 0.81  | 209.066  | C <sub>8</sub> H <sub>10</sub> N <sub>4</sub> O <sub>3</sub>  | -2   | 8-oxocaffeine                  |
| 28 | 5.92  | 431.0983 | C <sub>21</sub> H <sub>20</sub> O <sub>10</sub>               | -0.1 | Afzelin                        |
| 29 | 2.73  | 134.0469 | C <sub>3</sub> H <sub>7</sub> NO <sub>2</sub>                 | 1    | Alanine                        |
| 30 | 3.98  | 152.0348 | C <sub>7</sub> H <sub>7</sub> NO <sub>3</sub>                 | -0.5 | Aminosalicylic Acid            |
| 31 | 0.81  | 175.0244 | C <sub>6</sub> H <sub>8</sub> O <sub>6</sub>                  | -0.4 | Ascorbic acid                  |
| 32 | 6.8   | 447.0929 | C <sub>21</sub> H <sub>20</sub> O <sub>11</sub>               | -0.4 | Asiaticalin                    |
| 33 | 0.68  | 132.0298 | C <sub>4</sub> H <sub>7</sub> NO <sub>4</sub>                 | -0.5 | Aspartic acid                  |
| 34 | 4.75  | 915.1625 | C <sub>44</sub> H <sub>36</sub> O <sub>22</sub>               | 0    | Assamicain A                   |
| 35 | 4.75  | 915.1625 | C <sub>44</sub> H <sub>36</sub> O <sub>22</sub>               | 0    | Assamicain B                   |
| 36 | 4.75  | 915.1625 | C <sub>44</sub> H <sub>36</sub> O <sub>22</sub>               | 0    | Assamicain C                   |
| 37 | 6.8   | 447.0929 | C <sub>21</sub> H <sub>20</sub> O <sub>11</sub>               | -0.4 | Astragalin                     |
| 38 | 6.5   | 593.1509 | C <sub>27</sub> H <sub>30</sub> O <sub>15</sub>               | -0.3 | Biorobin                       |
| 39 | 6.35  | 637.1554 | C <sub>31</sub> H <sub>28</sub> O <sub>12</sub>               | -0.8 | Bis(8-epicatechiny)-methane    |
| 40 | 4.7   | 289.0712 | C <sub>15</sub> H <sub>14</sub> O <sub>6</sub>                | -0.5 | Catechin                       |
| 41 | 9.46  | 593.1299 | C <sub>30</sub> H <sub>26</sub> O <sub>13</sub>               | -0.2 | Catechin-(4 $\alpha$ →8)-EGC   |
| 42 | 4.49  | 745.1406 | C <sub>37</sub> H <sub>30</sub> O <sub>17</sub>               | -0.4 | Catechin-(4 $\alpha$ →8)-EGCG  |
| 43 | 3.82  | 109.0293 | C <sub>6</sub> H <sub>6</sub> O <sub>2</sub>                  | -0.2 | Catechol                       |
| 44 | 5.31  | 415.1605 | C <sub>19</sub> H <sub>28</sub> O <sub>10</sub>               | -0.5 | Chakanoside II                 |
| 17 | 10.62 | 285.0401 | C <sub>15</sub> H <sub>10</sub> O <sub>6</sub>                | -0.4 | 3',4',5,7-tetraOH-flavone      |
| 18 | 4.93  | 153.019  | C <sub>7</sub> H <sub>6</sub> O <sub>4</sub>                  | -0.4 | 3,5-diOH-benzoic acid          |
| 19 | 4.4   | 183.0293 | C <sub>7</sub> H <sub>6</sub> O <sub>3</sub>                  | -0.6 | 3-Hydroxybenzoic acid          |
| 20 | 4.81  | 337.0925 | C <sub>16</sub> H <sub>18</sub> O <sub>8</sub>                | -0.4 | 3-coumaroyl-quinic acid        |
| 21 | 3.93  | 353.0876 | C <sub>16</sub> H <sub>18</sub> O <sub>9</sub>                | -0.2 | 4-caffeoyl-quinic acid         |
| 22 | 4.81  | 337.0925 | C <sub>16</sub> H <sub>18</sub> O <sub>8</sub>                | -0.4 | 4-coumaroyl-quinic acid        |
| 23 | 4.3   | 353.0874 | C <sub>16</sub> H <sub>18</sub> O <sub>9</sub>                | -0.4 | 5-caffeoyl-quinic acid         |

|    |      |          |                                                               |      |                                  |
|----|------|----------|---------------------------------------------------------------|------|----------------------------------|
| 24 | 4.81 | 337.0925 | C <sub>16</sub> H <sub>18</sub> O <sub>8</sub>                | -0.4 | 5-coumaroyl-quinic acid          |
| 25 | 3.63 | 241.0825 | C <sub>10</sub> H <sub>14</sub> N <sub>2</sub> O <sub>5</sub> | -0.5 | 7-Me-xanthine                    |
| 26 | 0.69 | 333.0589 | C <sub>16</sub> H <sub>14</sub> O <sub>8</sub>                | -2.7 | 8-carboxyl-catechin              |
| 27 | 0.81 | 209.066  | C <sub>8</sub> H <sub>10</sub> N <sub>4</sub> O <sub>3</sub>  | -2   | 8-oxocaffeine                    |
| 28 | 5.92 | 431.0983 | C <sub>21</sub> H <sub>20</sub> O <sub>10</sub>               | -0.1 | Afzelin                          |
| 29 | 2.73 | 134.0469 | C <sub>3</sub> H <sub>7</sub> NO <sub>2</sub>                 | 1    | Alanine                          |
| 30 | 3.98 | 152.0348 | C <sub>7</sub> H <sub>7</sub> NO <sub>3</sub>                 | -0.5 | Aminosalicylic Acid              |
| 31 | 0.81 | 175.0244 | C <sub>6</sub> H <sub>8</sub> O <sub>6</sub>                  | -0.4 | Ascorbic acid                    |
| 32 | 6.8  | 447.0929 | C <sub>21</sub> H <sub>20</sub> O <sub>11</sub>               | -0.4 | Asiaticalin                      |
| 33 | 0.68 | 132.0298 | C <sub>4</sub> H <sub>7</sub> NO <sub>4</sub>                 | -0.5 | Aspartic acid                    |
| 34 | 4.75 | 915.1625 | C <sub>44</sub> H <sub>36</sub> O <sub>22</sub>               | 0    | Assamicain A                     |
| 35 | 4.75 | 915.1625 | C <sub>44</sub> H <sub>36</sub> O <sub>22</sub>               | 0    | Assamicain B                     |
| 36 | 4.75 | 915.1625 | C <sub>44</sub> H <sub>36</sub> O <sub>22</sub>               | 0    | Assamicain C                     |
| 37 | 6.8  | 447.0929 | C <sub>21</sub> H <sub>20</sub> O <sub>11</sub>               | -0.4 | Astragalin                       |
| 38 | 6.5  | 593.1509 | C <sub>27</sub> H <sub>30</sub> O <sub>15</sub>               | -0.3 | Biorobin                         |
| 39 | 6.35 | 637.1554 | C <sub>31</sub> H <sub>28</sub> O <sub>12</sub>               | -0.8 | Bis(8-epicatechinyl)-methane     |
| 40 | 4.7  | 289.0712 | C <sub>15</sub> H <sub>14</sub> O <sub>6</sub>                | -0.5 | Catechin                         |
| 41 | 9.46 | 593.1299 | C <sub>30</sub> H <sub>26</sub> O <sub>13</sub>               | -0.2 | Catechin-(4 $\alpha$ →8)-EGC     |
| 42 | 4.49 | 745.1406 | C <sub>37</sub> H <sub>30</sub> O <sub>17</sub>               | -0.4 | Catechin-(4 $\alpha$ →8)-EGCG    |
| 43 | 3.82 | 109.0293 | C <sub>6</sub> H <sub>6</sub> O <sub>2</sub>                  | -0.2 | Catechol                         |
| 44 | 5.31 | 415.1605 | C <sub>19</sub> H <sub>28</sub> O <sub>10</sub>               | -0.5 | Chakanoside II                   |
| 45 | 4.46 | 473.0722 | C <sub>22</sub> H <sub>18</sub> O <sub>12</sub>               | -0.3 | Chicoric acid                    |
| 46 | 4.12 | 387.1295 | C <sub>16</sub> H <sub>22</sub> O <sub>8</sub>                | -0.2 | Coniferin                        |
| 47 | 7.6  | 193.05   | C <sub>9</sub> H <sub>8</sub> O <sub>2</sub>                  | -0.7 | Cinnamic acid                    |
| 48 | 4.35 | 145.029  | C <sub>9</sub> H <sub>6</sub> O <sub>2</sub>                  | -0.5 | Coumarin                         |
| 49 | 4.81 | 337.0925 | C <sub>16</sub> H <sub>18</sub> O <sub>8</sub>                | -0.4 | Coumaroylquinic acid             |
| 50 | 4.05 | 593.1302 | C <sub>30</sub> H <sub>26</sub> O <sub>13</sub>               | 0.2  | desG theasinensin F              |
| 51 | 4.26 | 321.0253 | C <sub>14</sub> H <sub>10</sub> O <sub>9</sub>                | 0.1  | Digallic acid                    |
| 52 | 4.49 | 745.1406 | C <sub>37</sub> H <sub>30</sub> O <sub>17</sub>               | -0.4 | EC-(4 $\beta$ →8)-EGCG           |
| 53 | 4.92 | 897.1537 | C <sub>44</sub> H <sub>34</sub> O <sub>21</sub>               | 1.7  | ECG-(4 $\beta$ →6)-EGCG          |
| 54 | 4.92 | 897.1537 | C <sub>44</sub> H <sub>34</sub> O <sub>21</sub>               | 1.7  | ECG-(4 $\beta$ →8)-EGCG          |
| 55 | 4.49 | 745.1406 | C <sub>37</sub> H <sub>30</sub> O <sub>17</sub>               | -0.4 | EGC-(4 $\beta$ →8)-ECG           |
| 56 | 4.92 | 897.1537 | C <sub>44</sub> H <sub>34</sub> O <sub>21</sub>               | 1.7  | EGCG-(4 $\beta$ →6)-ECG          |
| 57 | 5.85 | 881.1578 | C <sub>44</sub> H <sub>34</sub> O <sub>20</sub>               | 0.8  | EA 3-gallate-(4 $\beta$ →6)-EGCG |
| 58 | 5.68 | 471.0929 | C <sub>23</sub> H <sub>20</sub> O <sub>11</sub>               | -0.3 | EGCG-4"-Me                       |
| 59 | 10.5 | 269.0451 | C <sub>15</sub> H <sub>10</sub> O <sub>5</sub>                | -0.4 | Emodin                           |
| 60 | 7.41 | 399.0722 | C <sub>20</sub> H <sub>16</sub> O <sub>9</sub>                | 0.1  | Epitheafagallin                  |
| 61 | 4.46 | 473.0722 | C <sub>21</sub> H <sub>16</sub> O <sub>10</sub>               | -0.3 | Epitheaflavic acid               |
| 62 | 0.69 | 333.0589 | C <sub>15</sub> H <sub>12</sub> O <sub>6</sub>                | -2.7 | Eriodictyol                      |

|     |       |          |                                                               |      |                                       |
|-----|-------|----------|---------------------------------------------------------------|------|---------------------------------------|
| 63  | 3.46  | 365.0489 | C <sub>15</sub> H <sub>12</sub> O <sub>8</sub>                | -2.5 | Fuzhuanin A                           |
| 64  | 4.39  | 311.0768 | C <sub>13</sub> H <sub>14</sub> O <sub>6</sub>                | -0.4 | Fuzhuanin B                           |
| 65  | 4.9   | 335.0764 | C <sub>16</sub> H <sub>16</sub> O <sub>8</sub>                | -0.8 | Fuzhuanin D                           |
| 66  | 4.75  | 169.0137 | C <sub>7</sub> H <sub>6</sub> O <sub>5</sub>                  | -0.6 | Gallic acid                           |
| 67  | 9.46  | 593.1299 | C <sub>30</sub> H <sub>26</sub> O <sub>13</sub>               | -0.2 | GC-(4 $\alpha$ →8)-EC                 |
| 68  | 4.4   | 183.0293 | C <sub>7</sub> H <sub>6</sub> O <sub>3</sub>                  | -0.6 | Gentisate aldehyde                    |
| 69  | 3.82  | 153.019  | C <sub>7</sub> H <sub>6</sub> O <sub>4</sub>                  | -0.3 | Gentisic acid                         |
| 70  | 9.14  | 301.035  | C <sub>15</sub> H <sub>10</sub> O <sub>7</sub>                | -0.4 | Herbacetin                            |
| 71  | 0.76  | 135.0296 | C <sub>5</sub> H <sub>4</sub> N <sub>4</sub> O                | -1.7 | Hypoxanthine                          |
| 72  | 7.6   | 193.05   | C <sub>10</sub> H <sub>10</sub> O <sub>4</sub>                | -0.7 | Isoferulic acid                       |
| 73  | 6.05  | 463.0877 | C <sub>21</sub> H <sub>20</sub> O <sub>12</sub>               | -0.5 | Isoquercitrin                         |
| 74  | 5.77  | 609.1462 | C <sub>26</sub> H <sub>28</sub> O <sub>14</sub>               | 0.1  | Isoschaftoside                        |
| 75  | 3.85  | 609.1255 | C <sub>29</sub> H <sub>24</sub> O <sub>12</sub>               | 0.5  | Isotheaflavin                         |
| 76  | 4.16  | 761.1363 | C <sub>36</sub> H <sub>28</sub> O <sub>16</sub>               | 0.3  | Isotheaflavin 3'-gallate              |
| 77  | 5.92  | 431.0983 | C <sub>21</sub> H <sub>20</sub> O <sub>10</sub>               | -0.1 | Isovitexin                            |
| 78  | 6.16  | 577.1552 | C <sub>27</sub> H <sub>30</sub> O <sub>14</sub>               | -1.1 | Kaempferitrin                         |
| 79  | 10.62 | 285.0401 | C <sub>15</sub> H <sub>10</sub> O <sub>6</sub>                | -0.4 | Kaempferol                            |
| 80  | 6.5   | 593.1509 | C <sub>27</sub> H <sub>30</sub> O <sub>15</sub>               | -0.3 | Kaempferol 3-Rha-galactoside          |
| 81  | 6.5   | 593.1509 | C <sub>27</sub> H <sub>30</sub> O <sub>15</sub>               | -0.3 | Kaempferol 3-rutinoside               |
| 82  | 6.08  | 755.2041 | C <sub>33</sub> H <sub>40</sub> O <sub>20</sub>               | 0.1  | Kaempferol 7-galactoside 3-rutinoside |
| 83  | 12.86 | 249.1851 | C <sub>15</sub> H <sub>24</sub>                               | -1   | Longifolene                           |
| 84  | 10.62 | 285.0401 | C <sub>15</sub> H <sub>10</sub> O <sub>6</sub>                | -0.4 | Luteolin                              |
| 85  | 0.82  | 133.014  | C <sub>4</sub> H <sub>6</sub> O <sub>5</sub>                  | -0.2 | Malic acid                            |
| 86  | 6.75  | 357.1338 | C <sub>20</sub> H <sub>22</sub> O <sub>6</sub>                | -0.6 | Matairesinol                          |
| 87  | 4.4   | 183.0293 | C <sub>8</sub> H <sub>8</sub> O <sub>5</sub>                  | -0.6 | Me 3,4,5-triOH-benzoate               |
| 88  | 9.14  | 301.035  | C <sub>15</sub> H <sub>10</sub> O <sub>7</sub>                | -0.4 | Morin                                 |
| 89  | 7.35  | 317.0302 | C <sub>15</sub> H <sub>10</sub> O <sub>8</sub>                | -0.1 | Myricetin                             |
| 90  | 5.25  | 479.0825 | C <sub>21</sub> H <sub>20</sub> O <sub>13</sub>               | -0.6 | Myricetin 3-galactoside               |
| 91  | 6.05  | 463.0877 | C <sub>21</sub> H <sub>20</sub> O <sub>12</sub>               | -0.5 | Myricitrin                            |
| 92  | 10.28 | 271.0606 | C <sub>15</sub> H <sub>12</sub> O <sub>5</sub>                | -0.6 | Naringenin                            |
| 93  | 3.85  | 609.1255 | C <sub>29</sub> H <sub>24</sub> O <sub>12</sub>               | 0.5  | Neotheaflavin                         |
| 94  | 6.5   | 593.1509 | C <sub>27</sub> H <sub>30</sub> O <sub>15</sub>               | -0.3 | Nicotiflorin                          |
| 95  | 4.93  | 777.1307 | C <sub>36</sub> H <sub>28</sub> O <sub>17</sub>               | -0.2 | Oolongtheanin                         |
| 96  | 3.76  | 218.103  | C <sub>9</sub> H <sub>17</sub> NO <sub>5</sub>                | -0.4 | Pantothenic acid                      |
| 97  | 7.09  | 163.0396 | C <sub>9</sub> H <sub>8</sub> O <sub>3</sub>                  | -0.4 | p-coumaric acid                       |
| 98  | 15.02 | 605.2408 | C <sub>35</sub> H <sub>34</sub> N <sub>4</sub> O <sub>6</sub> | 0.3  | Phaeophorbide B                       |
| 99  | 3.53  | 164.0713 | C <sub>9</sub> H <sub>11</sub> NO <sub>2</sub>                | -0.4 | Phenylalanine                         |
| 100 | 15.68 | 591.2612 | C <sub>35</sub> H <sub>36</sub> N <sub>4</sub> O <sub>5</sub> | -0.1 | Pheophorbide A                        |

|     |      |          |                                                 |      |                               |
|-----|------|----------|-------------------------------------------------|------|-------------------------------|
| 101 | 2.65 | 125.0241 | C <sub>6</sub> H <sub>6</sub> O <sub>3</sub>    | -0.3 | Phloroglucinol                |
| 102 | 4.9  | 277.0713 | C <sub>14</sub> H <sub>14</sub> O <sub>6</sub>  | -0.5 | Planchol A                    |
| 103 | 4.3  | 135.0447 | C <sub>8</sub> H <sub>8</sub> O <sub>2</sub>    | -0.5 | p-OH-acetophenone             |
| 104 | 4.4  | 577.1349 | C <sub>30</sub> H <sub>26</sub> O <sub>12</sub> | -0.2 | Procyanidin B2                |
| 105 | 4.98 | 729.1463 | C <sub>37</sub> H <sub>30</sub> O <sub>16</sub> | 0.2  | Procyanidin B-2 3'-gallate    |
| 106 | 4.4  | 577.1349 | C <sub>30</sub> H <sub>26</sub> O <sub>12</sub> | -0.2 | Procyanidin B3                |
| 107 | 4.4  | 577.1349 | C <sub>30</sub> H <sub>26</sub> O <sub>12</sub> | -0.2 | Procyanidin B4                |
| 108 | 4.4  | 577.1349 | C <sub>30</sub> H <sub>26</sub> O <sub>12</sub> | -0.2 | Procyanidin B5                |
| 109 | 4.53 | 865.1977 | C <sub>45</sub> H <sub>38</sub> O <sub>18</sub> | -0.8 | Procyanidin C1                |
| 110 | 3.85 | 609.1255 | C <sub>30</sub> H <sub>26</sub> O <sub>14</sub> | 0.5  | Prodelphinidin B              |
| 111 | 3.82 | 153.019  | C <sub>7</sub> H <sub>6</sub> O <sub>4</sub>    | -0.3 | Protocatechuic acid           |
| 112 | 7.62 | 481.114  | C <sub>25</sub> H <sub>22</sub> O <sub>10</sub> | 0    | Puerin C                      |
| 113 | 7.62 | 481.114  | C <sub>25</sub> H <sub>22</sub> O <sub>10</sub> | 0    | Puerin E                      |
| 114 | 4.67 | 416.1347 | C <sub>21</sub> H <sub>23</sub> NO <sub>8</sub> | -0.4 | Puerin V                      |
| 115 | 4.67 | 416.1347 | C <sub>21</sub> H <sub>23</sub> NO <sub>8</sub> | -0.4 | Puerin VI                     |
| 116 | 4.67 | 416.1347 | C <sub>21</sub> H <sub>23</sub> NO <sub>8</sub> | -0.4 | Puerin VII                    |
| 117 | 4.67 | 416.1347 | C <sub>21</sub> H <sub>23</sub> NO <sub>8</sub> | -0.4 | Puerin VIII                   |
| 118 | 2.65 | 125.0241 | C <sub>6</sub> H <sub>6</sub> O <sub>3</sub>    | -0.3 | Pyrogallol                    |
| 119 | 9.14 | 301.035  | C <sub>15</sub> H <sub>10</sub> O <sub>7</sub>  | -0.4 | Quercetin                     |
| 113 | 7.62 | 481.114  | C <sub>25</sub> H <sub>22</sub> O <sub>10</sub> | 0    | Puerin E                      |
| 114 | 4.67 | 416.1347 | C <sub>21</sub> H <sub>23</sub> NO <sub>8</sub> | -0.4 | Puerin V                      |
| 115 | 4.67 | 416.1347 | C <sub>21</sub> H <sub>23</sub> NO <sub>8</sub> | -0.4 | Puerin VI                     |
| 116 | 4.67 | 416.1347 | C <sub>21</sub> H <sub>23</sub> NO <sub>8</sub> | -0.4 | Puerin VII                    |
| 117 | 4.67 | 416.1347 | C <sub>21</sub> H <sub>23</sub> NO <sub>8</sub> | -0.4 | Puerin VIII                   |
| 118 | 2.65 | 125.0241 | C <sub>6</sub> H <sub>6</sub> O <sub>3</sub>    | -0.3 | Pyrogallol                    |
| 119 | 9.14 | 301.035  | C <sub>15</sub> H <sub>10</sub> O <sub>7</sub>  | -0.4 | Quercetin                     |
| 120 | 5.25 | 479.0825 | C <sub>20</sub> H <sub>18</sub> O <sub>11</sub> | -0.6 | Quercetin 3-arabinopyranoside |
| 121 | 6.8  | 447.0929 | C <sub>21</sub> H <sub>20</sub> O <sub>11</sub> | -0.4 | Quercetin 3-rhamnoside        |
| 122 | 5.77 | 609.1462 | C <sub>27</sub> H <sub>30</sub> O <sub>16</sub> | 0.1  | Quercetin-3-robinobioside     |
| 123 | 0.8  | 191.0556 | C <sub>7</sub> H <sub>12</sub> O <sub>6</sub>   | -0.5 | Quinic acid                   |
| 124 | 4.86 | 431.1917 | C <sub>19</sub> H <sub>30</sub> O <sub>8</sub>  | -0.5 | Roseoside                     |
| 125 | 5.77 | 609.1462 | C <sub>27</sub> H <sub>30</sub> O <sub>16</sub> | 0.1  | Rutin                         |
| 126 | 5.97 | 295.0815 | C <sub>13</sub> H <sub>14</sub> O <sub>5</sub>  | -0.8 | Salicifoliol                  |
| 127 | 4.15 | 137.024  | C <sub>7</sub> H <sub>6</sub> O <sub>3</sub>    | -0.4 | Salicylic acid                |
| 128 | 4.31 | 173.045  | C <sub>7</sub> H <sub>10</sub> O <sub>5</sub>   | -0.6 | Shikimic acid                 |
| 129 | 3.91 | 223.0605 | C <sub>11</sub> H <sub>12</sub> O <sub>5</sub>  | -0.7 | Sinapic acid                  |
| 130 | 5.57 | 197.0451 | C <sub>9</sub> H <sub>10</sub> O <sub>5</sub>   | -0.4 | Syringic acid                 |
| 131 | 4.49 | 349.058  | C <sub>15</sub> H <sub>12</sub> O <sub>7</sub>  | 1.5  | Taxifolin                     |
| 132 | 3.93 | 321.0612 | C <sub>14</sub> H <sub>12</sub> O <sub>6</sub>  | -0.4 | Teadenol A                    |

|     |       |          |                                                               |      |                            |
|-----|-------|----------|---------------------------------------------------------------|------|----------------------------|
| 133 | 3.93  | 321.0612 | C <sub>14</sub> H <sub>12</sub> O <sub>6</sub>                | -0.4 | Teadenol B                 |
| 134 | 6.31  | 231.0656 | C <sub>13</sub> H <sub>12</sub> O <sub>4</sub>                | -0.7 | Teasperin                  |
| 135 | 5.44  | 277.0711 | C <sub>14</sub> H <sub>14</sub> O <sub>6</sub>                | -0.7 | Teasperol                  |
| 136 | 7.41  | 399.0722 | C <sub>20</sub> H <sub>16</sub> O <sub>9</sub>                | 0.1  | Theaflagallin              |
| 137 | 4.62  | 565.1556 | C <sub>26</sub> H <sub>30</sub> O <sub>14</sub>               | -0.7 | Theaflavanoside I          |
| 138 | 4.92  | 897.1537 | C <sub>43</sub> H <sub>32</sub> O <sub>19</sub>               | 1.7  | Theaflavate A              |
| 139 | 4.49  | 745.1406 | C <sub>36</sub> H <sub>28</sub> O <sub>15</sub>               | -0.5 | Theaflavate B              |
| 140 | 4.46  | 473.0722 | C <sub>21</sub> H <sub>16</sub> O <sub>10</sub>               | -0.3 | Theaflavic acid            |
| 141 | 9.56  | 867.1419 | C <sub>43</sub> H <sub>32</sub> O <sub>20</sub>               | 0.4  | Theaflavin 3,3'-digallate  |
| 142 | 9.28  | 715.1304 | C <sub>36</sub> H <sub>28</sub> O <sub>16</sub>               | 0    | Theaflavin-3'-gallate      |
| 143 | 9.28  | 715.1304 | C <sub>36</sub> H <sub>28</sub> O <sub>16</sub>               | 0    | Theaflavin-3-gallate       |
| 144 | 4.75  | 913.1473 | C <sub>44</sub> H <sub>34</sub> O <sub>22</sub>               | 0.4  | Theasinensin A             |
| 145 | 4.16  | 761.1363 | C <sub>37</sub> H <sub>30</sub> O <sub>18</sub>               | 0.3  | Theasinensin B             |
| 146 | 3.85  | 609.1255 | C <sub>30</sub> H <sub>26</sub> O <sub>14</sub>               | 0.5  | Theasinensin C             |
| 147 | 4.75  | 913.1473 | C <sub>44</sub> H <sub>34</sub> O <sub>22</sub>               | 0.4  | Theasinensin D             |
| 148 | 3.85  | 609.1255 | C <sub>30</sub> H <sub>26</sub> O <sub>14</sub>               | 0.5  | Theasinensin E             |
| 149 | 4.92  | 897.1537 | C <sub>44</sub> H <sub>34</sub> O <sub>21</sub>               | 1.7  | Theasinensin G             |
| 150 | 3.46  | 343.0668 | C <sub>14</sub> H <sub>16</sub> O <sub>10</sub>               | -0.3 | Theogallin                 |
| 151 | 6.97  | 179.0557 | C <sub>7</sub> H <sub>8</sub> N <sub>4</sub> O <sub>2</sub>   | -1.8 | Theophylline               |
| 152 | 9.46  | 593.1299 | C <sub>30</sub> H <sub>26</sub> O <sub>13</sub>               | -0.2 | Tiliroside                 |
| 153 | 3.95  | 203.0819 | C <sub>11</sub> H <sub>12</sub> N <sub>2</sub> O <sub>2</sub> | -0.7 | Tryptophan                 |
| 154 | 1.75  | 180.0661 | C <sub>9</sub> H <sub>11</sub> NO <sub>3</sub>                | -0.5 | Tyrosine                   |
| 155 | 4.07  | 167.0343 | C <sub>8</sub> H <sub>8</sub> O <sub>4</sub>                  | -0.7 | Vanillic acid              |
| 156 | 6.5   | 593.1509 | C <sub>27</sub> H <sub>30</sub> O <sub>15</sub>               | -0.3 | Vicenin 2                  |
| 157 | 5.92  | 431.0983 | C <sub>21</sub> H <sub>20</sub> O <sub>10</sub>               | -0.1 | Vitexin                    |
| 158 | 6.5   | 593.1509 | C <sub>27</sub> H <sub>30</sub> O <sub>15</sub>               | -0.3 | Vitexin-2                  |
| 159 | 6.16  | 577.1552 | C <sub>27</sub> H <sub>30</sub> O <sub>14</sub>               | -1.1 | Vitexin-2"-rhamnoside      |
| 160 | 6.5   | 593.1509 | C <sub>27</sub> H <sub>30</sub> O <sub>15</sub>               | -0.3 | Vitexin-4"-glucoside       |
| 161 | 1.65  | 151.0256 | C <sub>5</sub> H <sub>4</sub> N <sub>4</sub> O <sub>2</sub>   | -0.5 | Xanthine                   |
| 162 | 5.94  | 293.0663 | C <sub>13</sub> H <sub>12</sub> O <sub>5</sub>                | -0.3 | Xanthocerin                |
| 163 | 12.86 | 249.1851 | C <sub>15</sub> H <sub>24</sub>                               | -1   | α-Gurjunene                |
| 164 | 12.86 | 249.1851 | C <sub>15</sub> H <sub>24</sub>                               | -1   | α-Humulene                 |
| 165 | 13.6  | 277.2168 | C <sub>18</sub> H <sub>30</sub> O <sub>2</sub>                | -0.5 | α-linolenic acid           |
| 166 | 12.86 | 249.1851 | C <sub>15</sub> H <sub>24</sub>                               | -1   | α-Muurolene                |
| 167 | 2.49  | 331.0668 | C <sub>13</sub> H <sub>16</sub> O <sub>10</sub>               | -0.3 | β-glucogallin              |
| 168 | 1.64  | 102.0558 | C <sub>4</sub> H <sub>9</sub> NO <sub>2</sub>                 | -0.2 | γ-Aminobutyric acid        |
| 169 | 5.85  | 441.0825 | C <sub>22</sub> H <sub>18</sub> O <sub>10</sub>               | -0.2 | Epicatechin 3-gallate      |
| 170 | 3.78  | 305.0666 | C <sub>15</sub> H <sub>14</sub> O <sub>7</sub>                | -0.1 | Epigallocatechin           |
| 171 | 4.74  | 457.0775 | C <sub>22</sub> H <sub>18</sub> O <sub>11</sub>               | -0.2 | Epigallocatechin-3-gallate |

|     |      |          |                                                              |      |                  |
|-----|------|----------|--------------------------------------------------------------|------|------------------|
| 172 | 4.3  | 179.0343 | C <sub>9</sub> H <sub>8</sub> O <sub>4</sub>                 | -0.7 | Caffeic acid     |
| 173 | 4.3  | 353.0874 | C <sub>16</sub> H <sub>18</sub> O <sub>9</sub>               | -0.4 | Chlorogenic acid |
| 174 | 5.87 | 300.9987 | C <sub>14</sub> H <sub>6</sub> O <sub>8</sub>                | -0.3 | Ellagic acid     |
| 175 | 7.6  | 193.05   | C <sub>10</sub> H <sub>10</sub> O <sub>4</sub>               | -0.7 | Ferulic acid     |
| 176 | 8.84 | 563.1195 | C <sub>29</sub> H <sub>24</sub> O <sub>12</sub>              | 0    | Theaflavin       |
| 177 | 0.96 | 173.0926 | C <sub>7</sub> H <sub>14</sub> N <sub>2</sub> O <sub>3</sub> | -0.5 | Theanine         |
| 178 | 0.81 | 179.0556 | C <sub>7</sub> H <sub>8</sub> N <sub>4</sub> O <sub>2</sub>  | -1.8 | Theobromine      |

Supplementary Table S4. HPLC detection of 19 amino acids in FBT samples (mg/g)

|       | S1           | S2          | S3          | S4          | S5           | S6          | S7          |
|-------|--------------|-------------|-------------|-------------|--------------|-------------|-------------|
| Asp   | 1.00±0.03b   | 1.08±0.06a  | 0.85±0.02c  | 0.29±0.003d | 0.33±0.003d  | ND          | 0.14±0.004e |
| Glu   | 1.25±0.17a   | 1.24±0.11a  | 1.00±0.03b  | 0.18±0.04c  | 0.03±0.02c   | ND          | ND          |
| Asn   | 0.39±0.004b  | 0.37±0.02b  | 0.36±0.004b | 0.28±0.05c  | 0.30±0.03c   | 0.36±0.001b | 0.19±0.02d  |
| Gln   | 0.36±0.01a   | 0.33±0.02a  | 0.37±0.01a  | 0.15±0.008c | 0.17±0.01c   | 0.21±0.02b  | 0.18±0.07d  |
| Gly   | 0.55±0.03b   | 0.67±0.03a  | 0.54±0.01b  | 0.45±0.01c  | 0.49±0.02c   | 0.65±0.03a  | ND          |
| Pro   | 0.58±0.06a   | 0.60±0.07a  | 0.59±0.002a | ND          | ND           | ND          | ND          |
| Ala   | 1.17±0.29a   | 1.30±0.07a  | 0.48±0.02b  | 0.46±0.02b  | ND           | ND          | ND          |
| Ser   | 0.28±0.07a   | 0.25±0.02ab | 0.17±0.01c  | 0.27±0.07ab | 0.20±0.008bc | ND          | ND          |
| L-The | 6.36±0.53a   | 0.89±0.13b  | 0.92±0.05b  | 0.54±0.11bc | 0.29±0.006c  | 0.25±0.12c  | 0.35±0.07c  |
| Tyr   | 2.21±0.33b   | 0.60±0.07d  | 0.56±0.01d  | 3.33±0.41a  | 3.14±0.24a   | 1.28±0.12c  | 0.42±0.39d  |
| Arg   | 0.97±0.11d   | 1.13±0.04cd | 1.12±0.01d  | 1.43±0.02ab | 1.55±0.16a   | 1.54±0.03a  | 1.31±0.14bc |
| Val   | 0.14±0.02d   | ND          | 0.31±0.001c | 0.68±0.02a  | 0.74±0.10a   | 0.53±0.10b  | 0.42±0.10bc |
| Met   | 0.02±0.006c  | 0.24±0.15b  | 0.31±0.02b  | 0.03±0.01c  | ND           | 0.73±0.14a  | 0.24±0.09b  |
| Trp   | 0.40±0.11a   | 0.35±0.11ab | 0.24±0.02bc | 0.15±0.01c  | 0.14±0.03c   | ND          | ND          |
| Ile   | 0.12±0.05bc  | 0.09±0.03bc | ND          | ND          | ND           | 0.17±0.01ab | 0.21±0.25a  |
| Phe   | 0.14±0.004ab | 0.18±0.02ab | 0.20±0.02a  | 0.11±0.01c  | 0.09±0.01c   | 0.09±0.08bc | 0.19±0.07ab |
| Leu   | 0.22±0.06a   | 0.09±0.02b  | 0.04±0.01bc | ND          | 0.01±0.01c   | 0.04±0.03bc | ND          |

Note: Values in the same column labeled with different superscript letters (a–e) differ significantly ( $p < 0.05$ ).

Supplementary Table S5. VIF value of 9 critical ingredients

|           | TP    | TPs   | Gallic acid | Caffeine | EGC   | GCG   | Gln   | L-The | Lys   |
|-----------|-------|-------|-------------|----------|-------|-------|-------|-------|-------|
| VIF value | 7.862 | 2.809 | 3.642       | 2.835    | 4.516 | 6.113 | 4.759 | 6.150 | 2.533 |

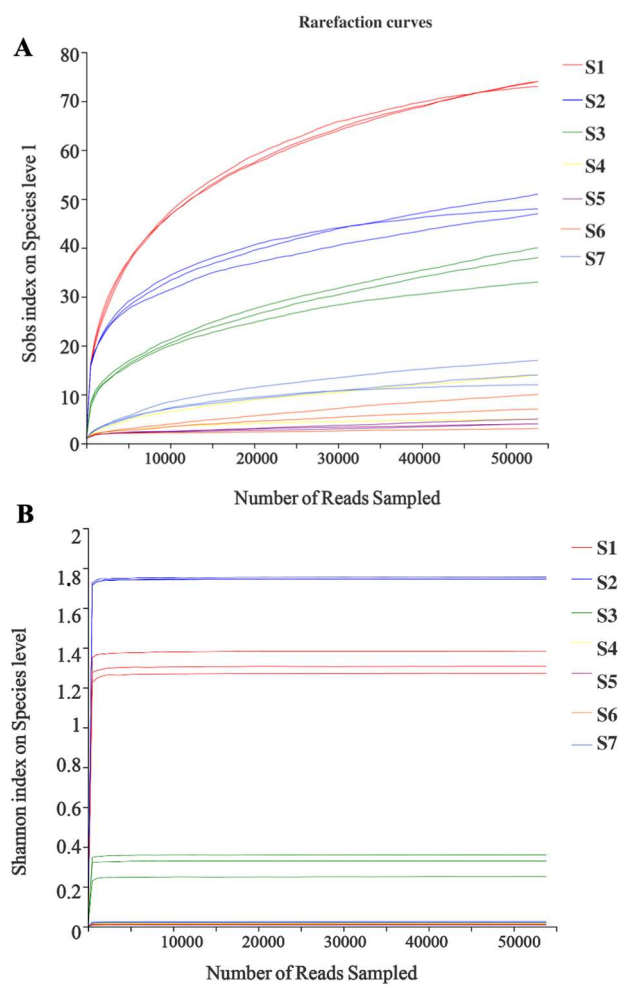

Supplementary Figure S1. Rarefaction curve analysis of the fungal community in the fermentation process of FBT. Fungus sobs curve (A), fungus Shannon-Wiener curve (B)



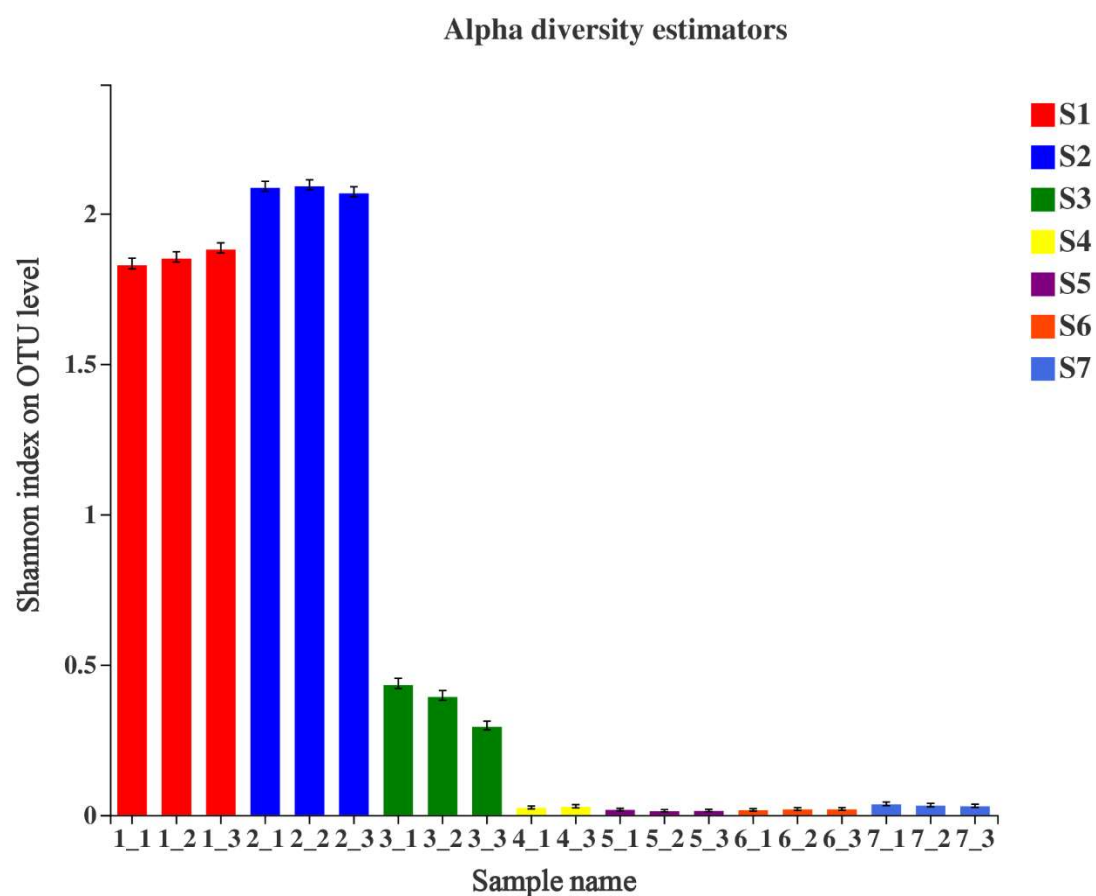

Supplementary Figure S2. The number of operational taxonomic units (OTUs) and alpha diversity estimators for fungal communities in FBT samples.

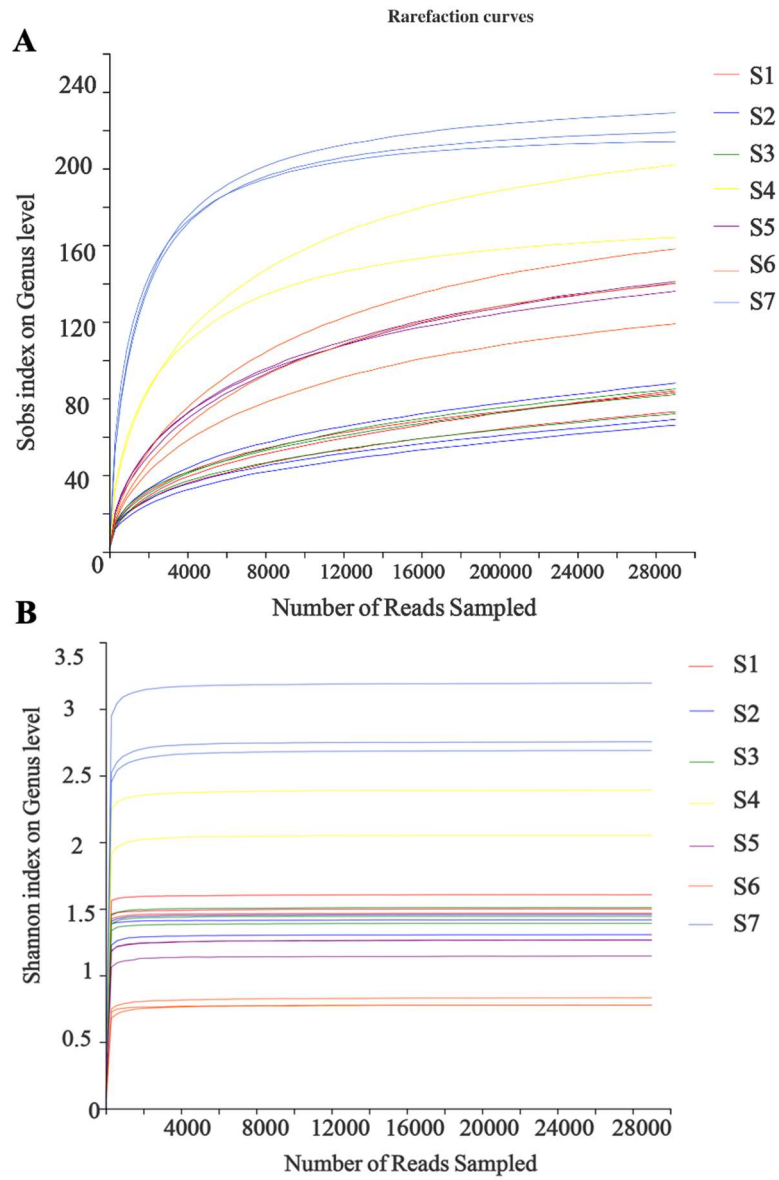

Supplementary Figure S3. Rarefaction curve analysis of the bacterial community in the fermentation process of FBT. Bacterial sobs curve (A), Bacterial Shannon-Wiener curve (B)

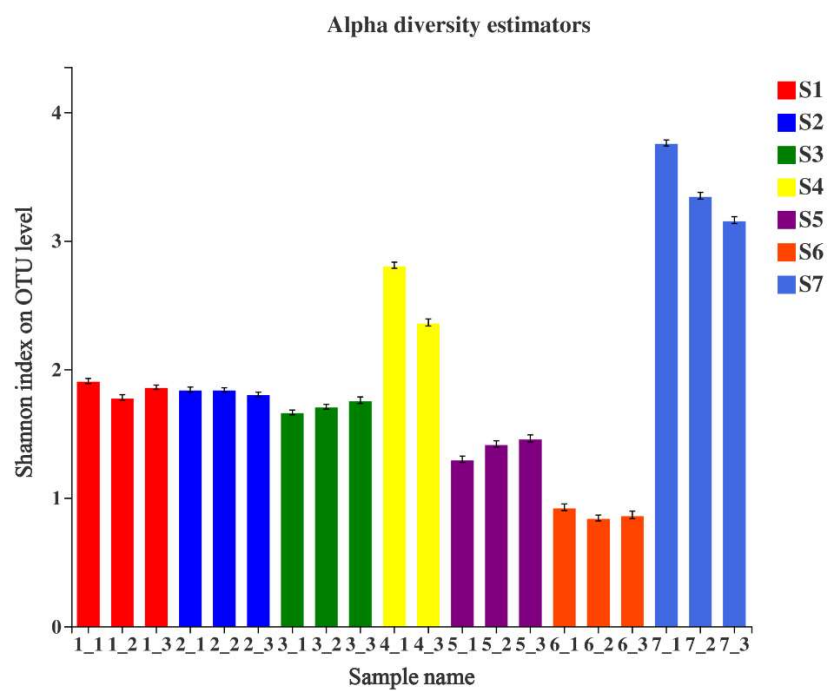

Supplementary Figure S4. The number of operational taxonomic units (OTUs) and alpha diversity estimators for bacterial communities in FBT samples.
